# Supplementary material for: The Exchange Mechanism of Alkaline and Alkaline-Earth Ions in Zeolite N
Source: Molecules. 2019 Oct 10;24(20):3652. doi: 10.3390/molecules24203652 (PMC6832695; doi:10.3390/molecules24203652)
Supplement: Supplementary file 1 [file molecules-24-03652-s001.pdf]

# Exchange Mechanism of Alkaline and Alkalineearth Elements in Zeolite N

Monireh Khosravi <sup>1,\*</sup>, Vinuthaa Murthy <sup>2</sup> and Ian D R Mackinnon <sup>1</sup>

<sup>1</sup> Institute for Future Environments and Science and Engineering Faculty, Queensland University of Technology, Brisbane, QLD 4001, Australia

<sup>2</sup> College of Engineering, IT and Environment, Charles Darwin University, Darwin, NT 0909, Australia.

\* Correspondence: monireh.khosravinasab@qut.edu.au;

**Table S1.** The Mulliken partial charges, force field assigned types and number of framework, extra-framework and water atoms used in this study.

| Atom             | Atomic charges | Force fields assigned | Number of atoms |       |
|------------------|----------------|-----------------------|-----------------|-------|
|                  |                |                       | (001)           | (110) |
| Si 1             | 1.756          | si4z                  | 16              | 16    |
| Si 2             | 1.718          | si4z                  | 64              | 64    |
| Al 1             | 1.654          | al4z                  | 16              | 16    |
| Al 2             | 1.623          | al4z                  | 64              | 64    |
| O                | -1.0886        | o2z                   | 304             | 312   |
| O <sub>-OH</sub> | -0.8453        | o2z                   | 32              | 16    |
| H <sub>-OH</sub> | 0.299          | h1o                   | 32              | 16    |
| K1               | +1             | k+                    | 32              | 32    |
| K2               | +1             | k+                    | 64              | 64    |
| Cl               | -1             | cl+                   | 16              | 16    |
| O <sub>w</sub>   | -0.82          | o2*                   | 128             | 128   |
| H <sub>w</sub>   | 0.41           | h1o                   | 256             | 256   |

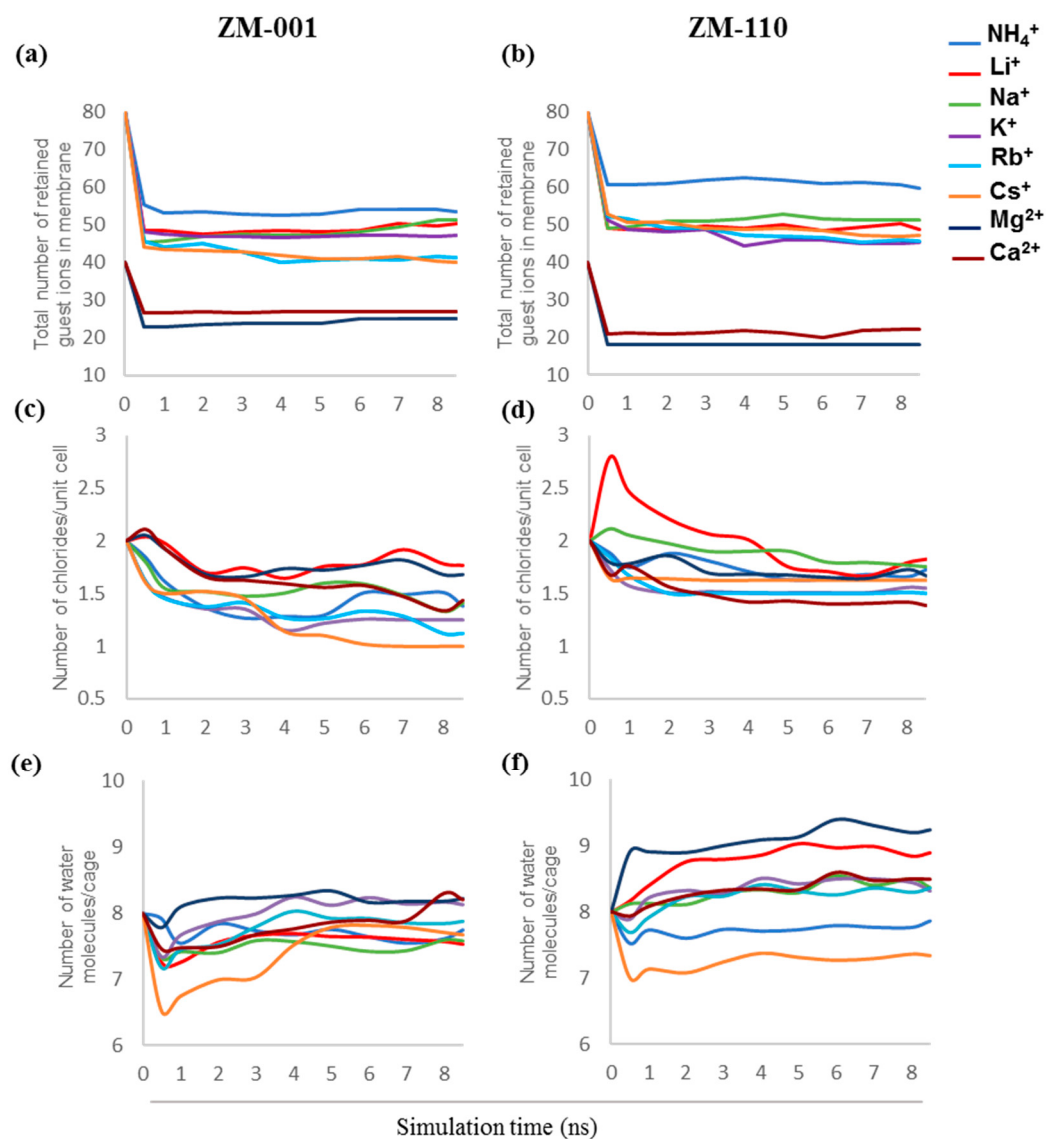

**Figure S1.** The retention of guest cations in (a) ZM-001 and (b) ZM-110, the number of retained chlorides and per unit cell of (c) ZM-001 and (e) ZM-110; ZM-001 and number of remained water molecules in each cage of (d) ZM-001 and (f) ZM-110.

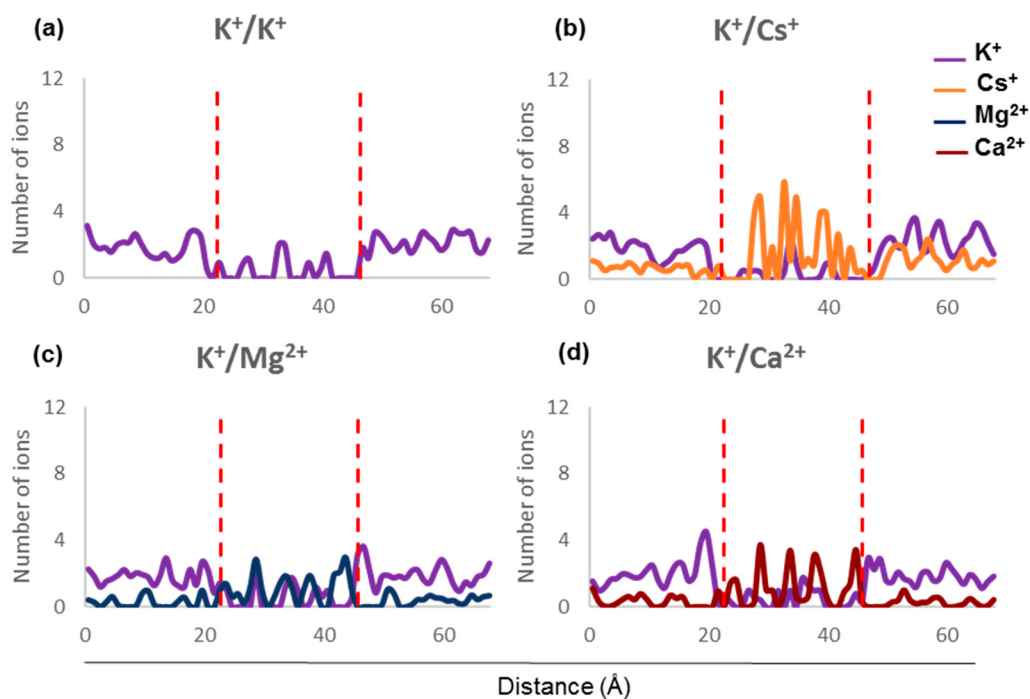

**Figure S2.** (a-d) ion concentration profiles along z direction after 8.5 ns MD simulations. The two red dashed lines indicate the location of ZM-001 surfaces in electrolyte solution.

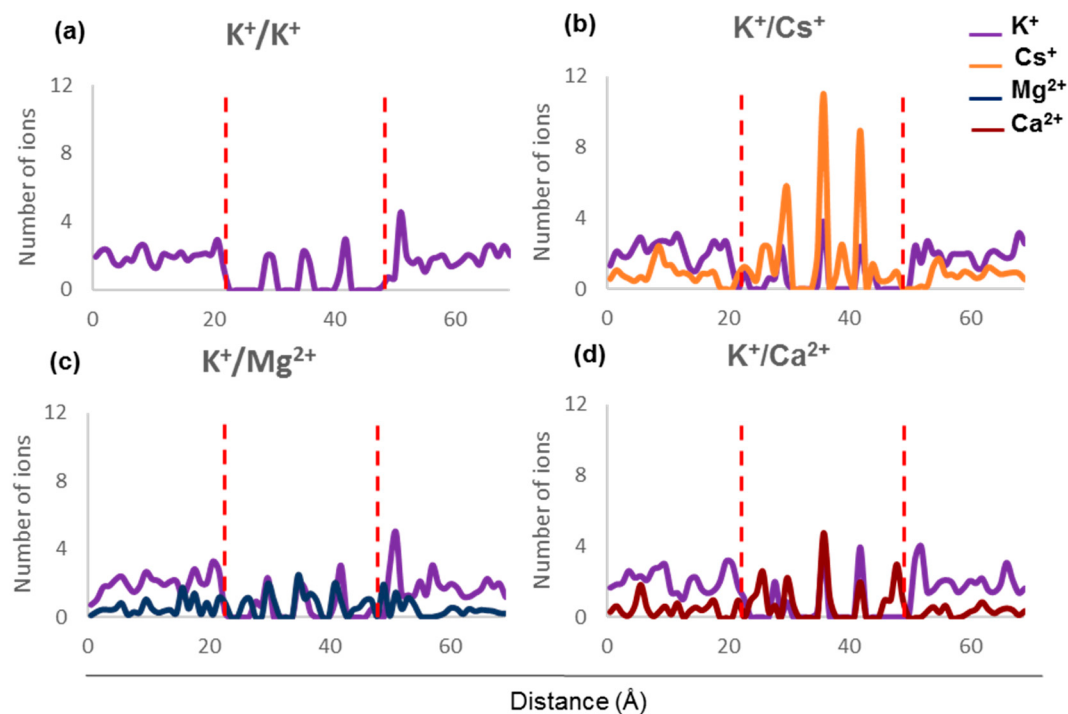

**Figure S3.** (a-d) ion concentration profiles along z direction after 8.5 ns MD simulations. The two red dashed lines indicate the location of ZM-110 surfaces in electrolyte solution.

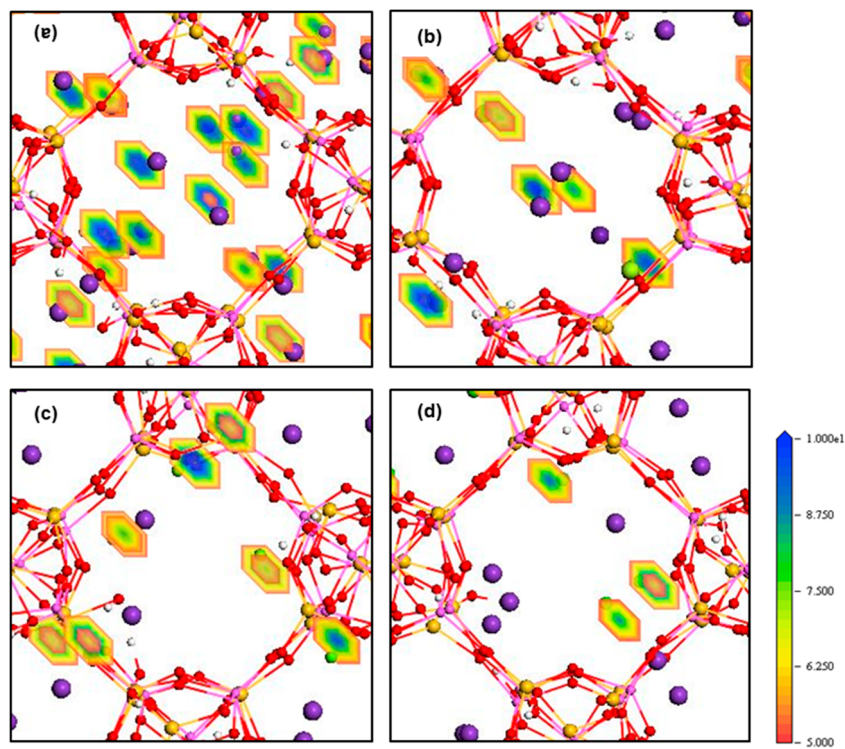

**Figure S4.** Density field maps of (a) K<sup>+</sup> in K<sup>+</sup>/K<sup>+</sup> system and M<sup>n</sup> guest cations in (b) K<sup>+</sup>/Rb<sup>+</sup>, (c) K<sup>+</sup>/Mg<sup>2+</sup> and (d) K<sup>+</sup>/Ca<sup>2+</sup> systems retained inside ZM-001 after 8.5 ns MD simulations.

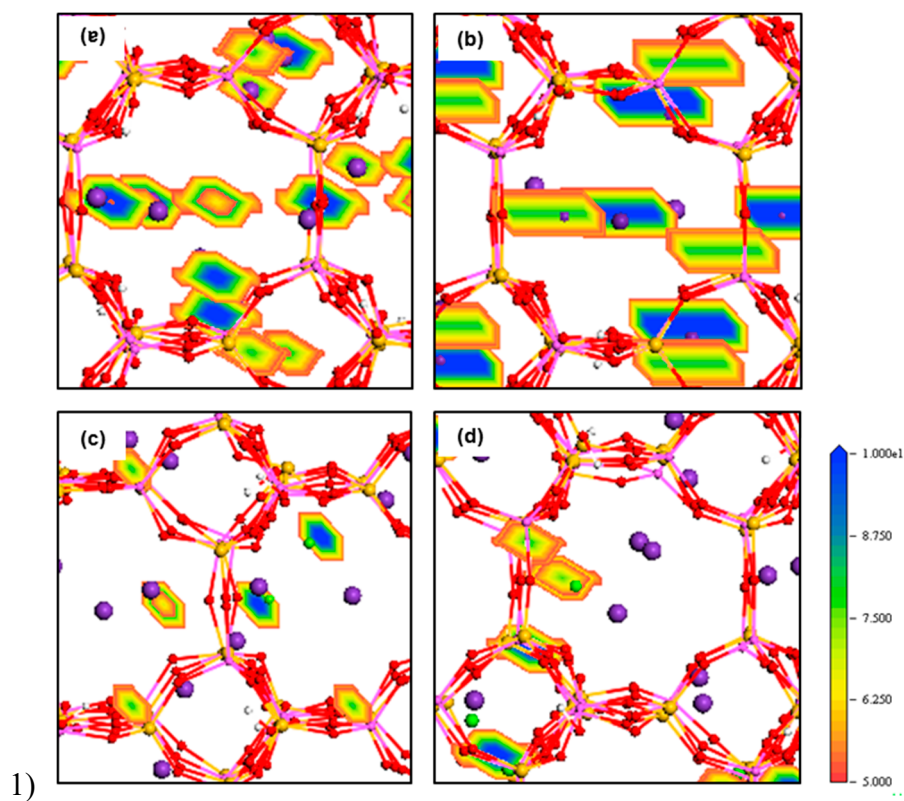

**Figure S5.** Density field maps of (a) K<sup>+</sup> in K<sup>+</sup>/K<sup>+</sup> system and M<sup>n</sup> guest cations in (b) K<sup>+</sup>/Rb<sup>+</sup>, (c) K<sup>+</sup>/Mg<sup>2+</sup> and (d) K<sup>+</sup>/Ca<sup>2+</sup> systems retained inside ZM-110 after 8.5 ns MD simulations.

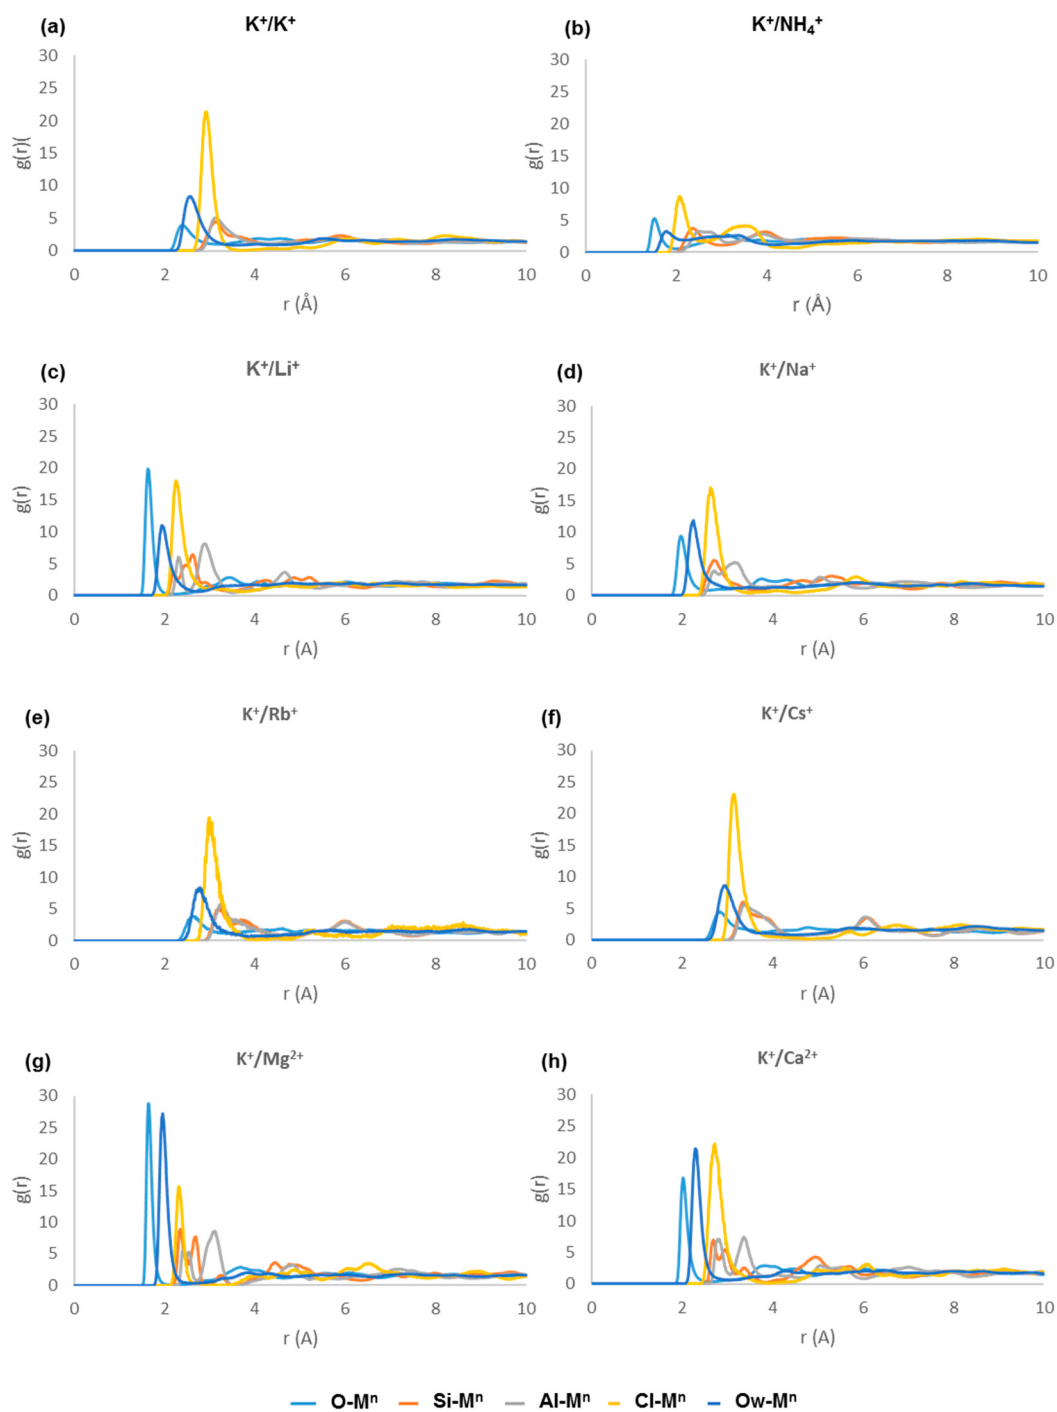

**Figure S6.** RDFs,  $g(r)$  for guest cations to framework atoms, chlorides and water molecules inside ZM-001 membrane.

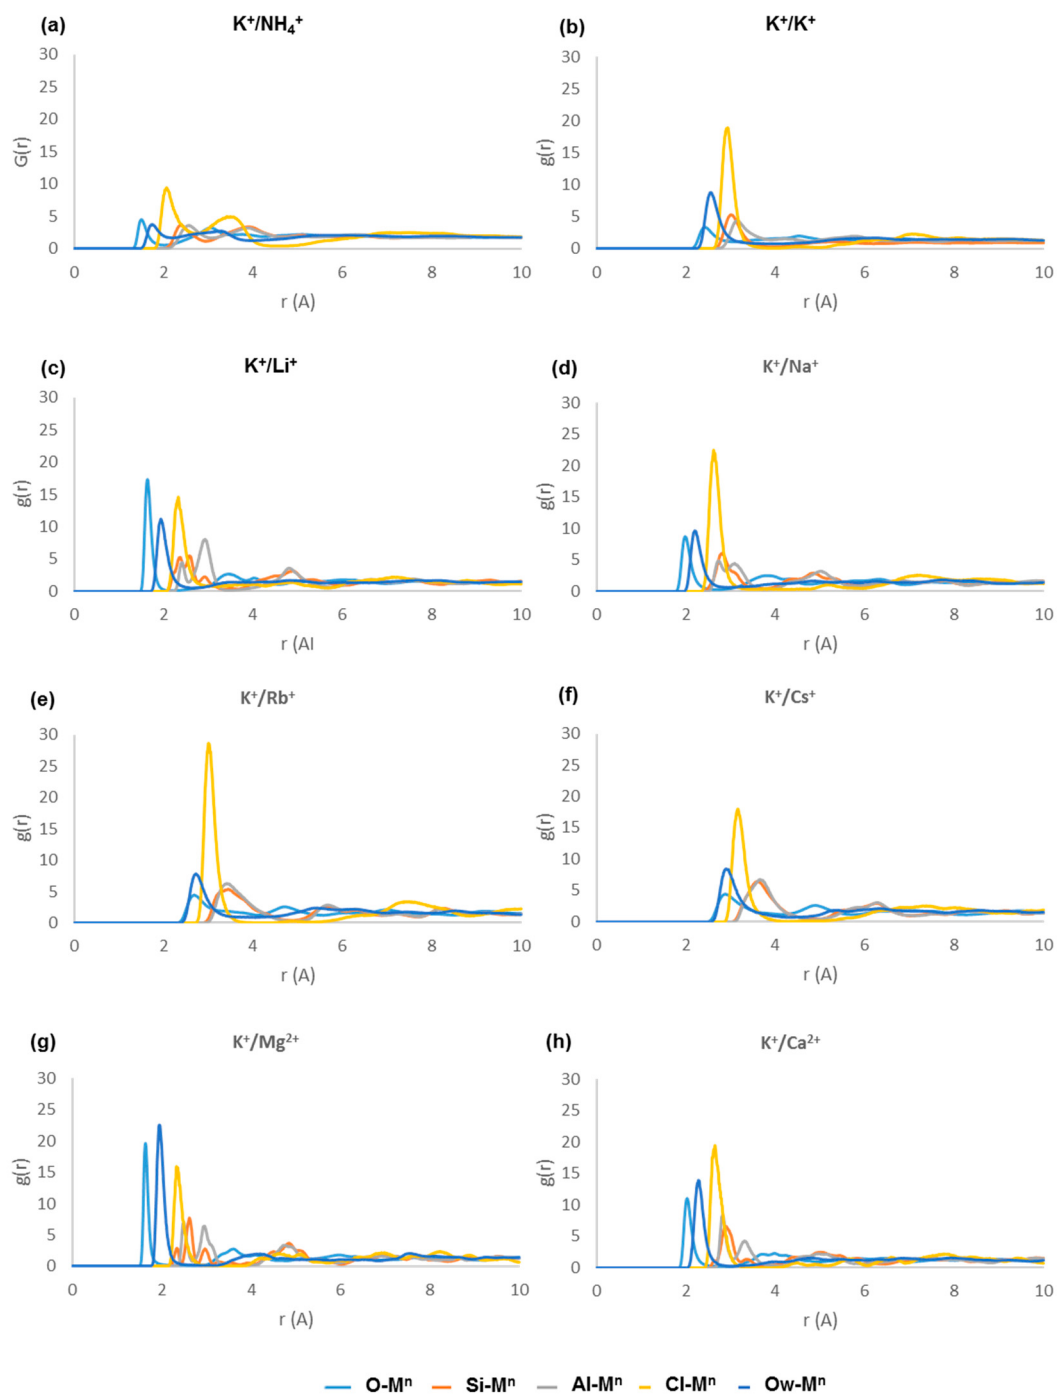

**Figure S7.** RDFs,  $g(r)$  for guest cations to framework atoms, chlorides and water molecules inside ZM-110 membrane.

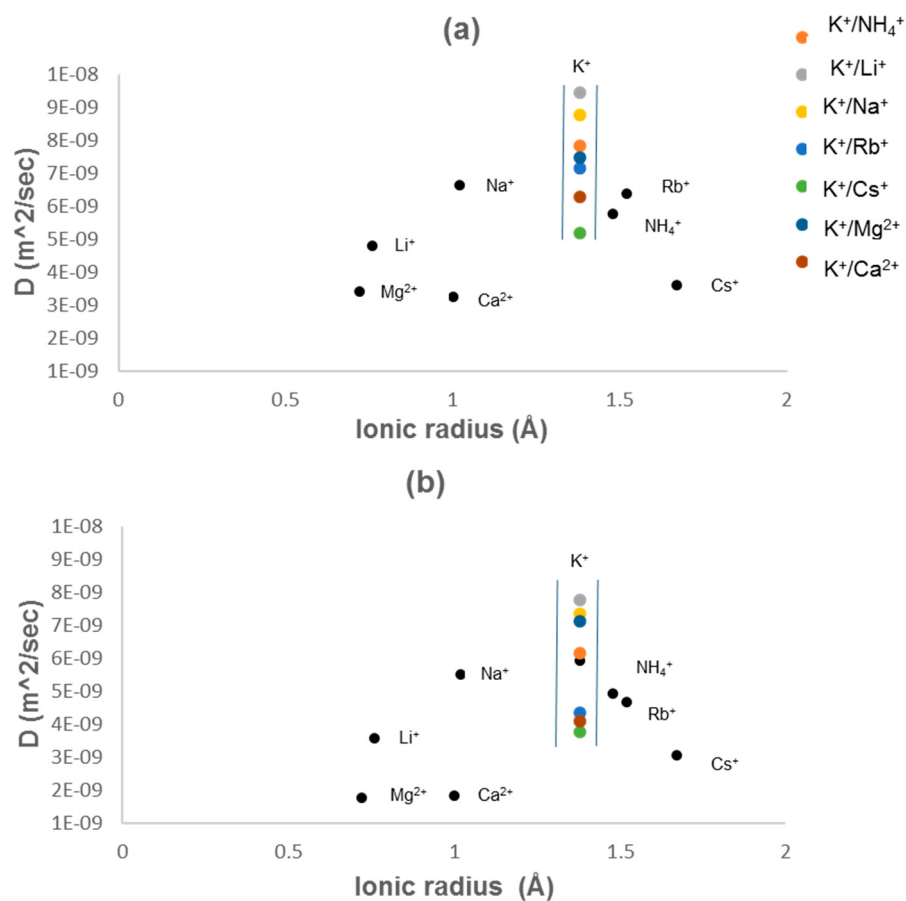

**Figure S8.** Self-diffusion coefficient of ions ( $D$ ) inside electrolyte vs. ionic radius. The black labelled points are  $D$  values of guest cation in each system. The  $D$  values of  $\text{K}^+$  cations in electrolyte of each system are identified with different colours.

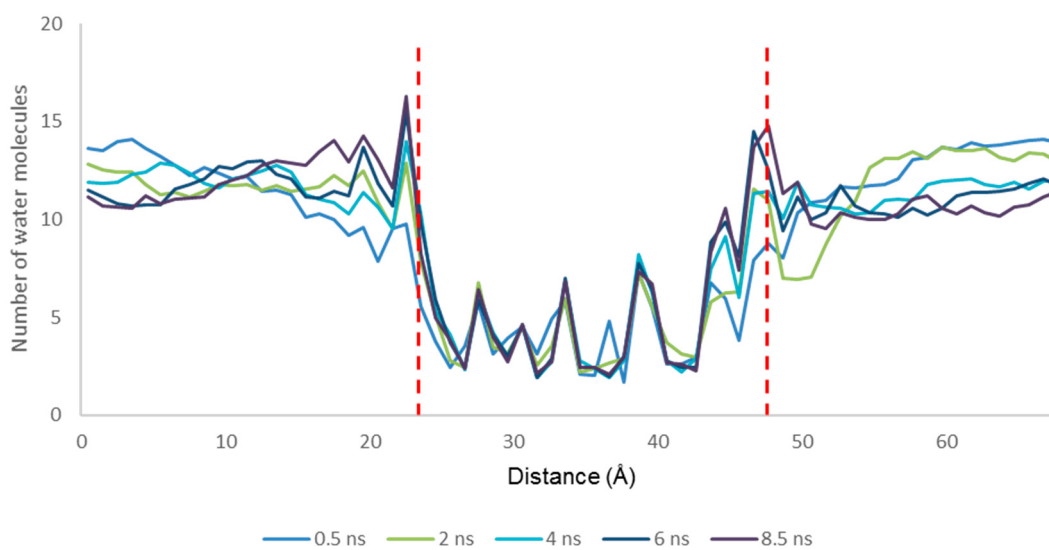

**Figure S9.** The concentration profile of water molecules along  $z$  direction for different times of MD simulations for  $\text{K}^+/\text{Cs}^+$  system of ZM-001. The two red dashed lines indicate the location of ZM-001 surfaces in electrolyte solution.
